# Supplementary material for: Polymorphism and the influence of crystal structure on the luminescence of the opto-electronic material 4,4′-bis(9-carbazolyl)biphenyl
Source: Royal Society of Chemistry journal article supplement (doi:10.1039/c4ce01056f), 2014-01-01
Supplement: c4ce01056f1.pdf [file c4ce01056f1.pdf]

Electronic Supplementary Information for

## Polymorphism and the influence of crystal structure on the luminescence of the opto-electronic material 4,4'-bis(9-carbazolyl)biphenyl

Cody J. Gleason<sup>a</sup>, Jordan M. Cox<sup>a</sup>, Ian M. Walton<sup>a</sup>, and Jason B. Benedict<sup>a,\*</sup>

**Full reference for reference 31:** Gaussian 09, Revision A.02, Frisch, M. J.; Trucks, G. W.; Schlegel, H. B.; Scuseria, G. E.; Robb, M. A.; Cheeseman, J. R.; Scalmani, G.; Barone, V.; Mennucci, B.; Petersson, G. A.; Nakatsuji, H.; Caricato, M.; Li, X.; Hratchian, H. P.; Izmaylov, A. F.; Bloino, J.; Zheng, G.; Sonnenberg, J. L.; Hada, M.; Ehara, M.; Toyota, K.; Fukuda, R.; Hasegawa, J.; Ishida, M.; Nakajima, T.; Honda, Y.; Kitao, O.; Nakai, H.; Vreven, T.; Montgomery, J. A., Jr.; Peralta, J. E.; Ogliaro, F.; Bearpark, M.; Heyd, J. J.; Brothers, E.; Kudin, K. N.; Staroverov, V. N.; Kobayashi, R.; Normand, J.; Raghavachari, K.; Rendell, A.; Burant, J. C.; Iyengar, S. S.; Tomasi, J.; Cossi, M.; Rega, N.; Millam, N. J.; Klene, M.; Knox, J. E.; Cross, J. B.; Bakken, V.; Adamo, C.; Jaramillo, J.; Gomperts, R.; Stratmann, R. E.; Yazyev, O.; Austin, A. J.; Cammi, R.; Pomelli, C.; Ochterski, J. W.; Martin, R. L.; Morokuma, K.; Zakrzewski, V. G.; Voth, G. A.; Salvador, P.; Dannenberg, J. J.; Dapprich, S.; Daniels, A. D.; Farkas, Ö.; Foresman, J. B.; Ortiz, J. V.; Cioslowski, J.; Fox, D. J. Gaussian, Inc., Wallingford CT, 2009.

Packing diagrams for the three **CBP** polymorphs:

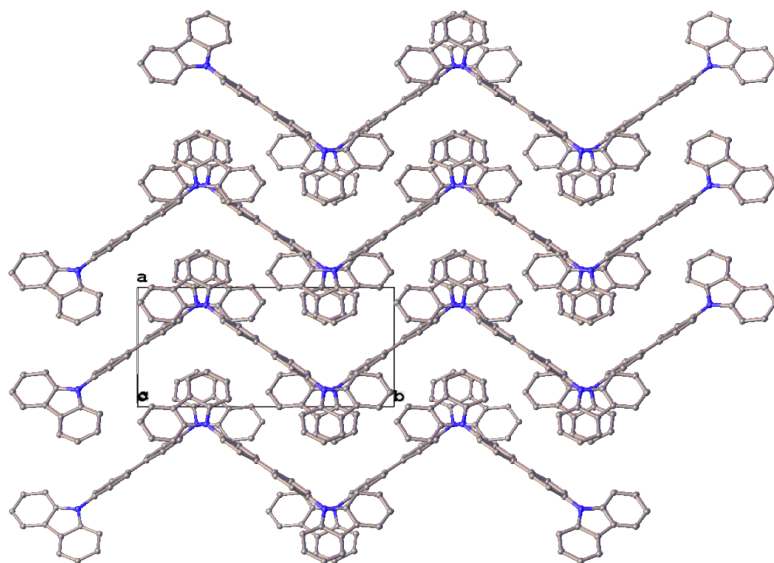

**Figure S1.** Packing diagram of  $\alpha$ -CBP viewed down the c-axis.

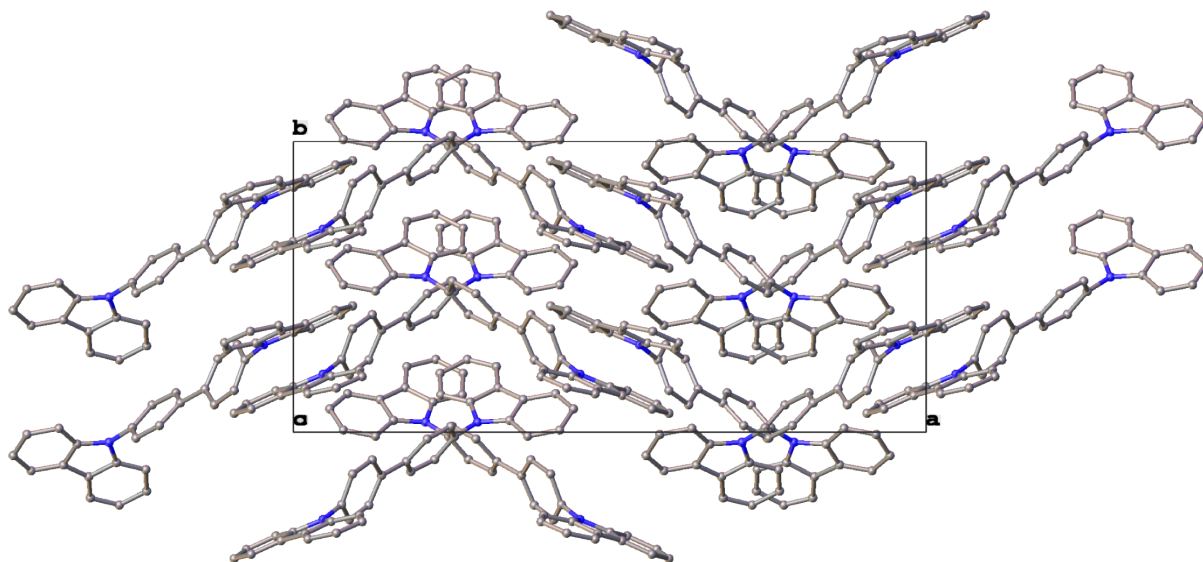

**Figure S2.** Packing diagram of  $\beta$ -CBP viewed down the  $c$ -axis.

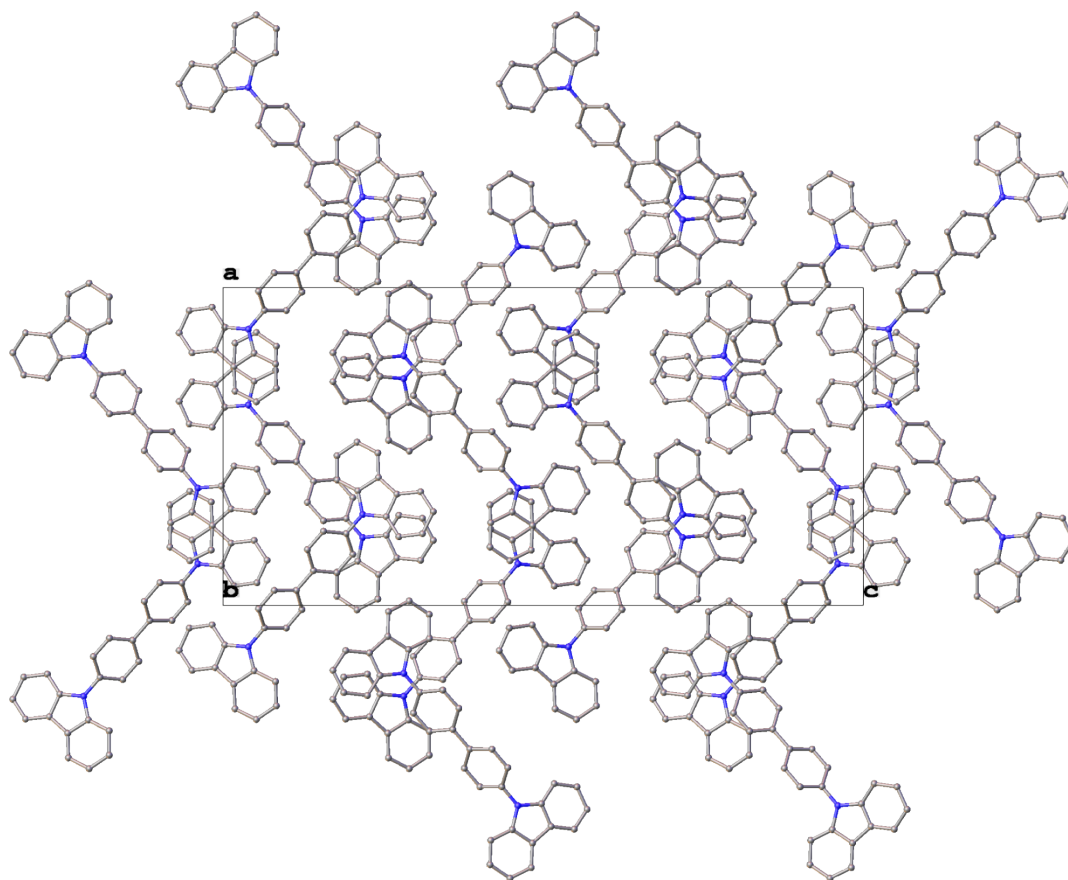

**Figure S3.** Packing diagram of  $\gamma$ -CBP viewed down the  $b$ -axis.

Crystallographic Tables for the three CBP polymorphs:

**Table S1.** Fractional Atomic Coordinates ( $\times 10^4$ ) and Equivalent Isotropic Displacement Parameters ( $\text{\AA}^2 \times 10^3$ ) for  $\alpha$ -CBP.  $U_{\text{eq}}$  is defined as 1/3 of the trace of the orthogonalised  $U_{11}$  tensor.

| Atom | <i>x</i>     | <i>y</i>   | <i>z</i>     | $U(\text{eq})$ |
|------|--------------|------------|--------------|----------------|
| N1   | 1455.3 (14)  | 7308.6 (6) | 2067.2 (11)  | 13.5 (2)       |
| C1   | 1555.3 (17)  | 8156.0 (7) | 2412.6 (13)  | 13.9 (3)       |
| C2   | 2826.3 (18)  | 8577.9 (8) | 3495.8 (13)  | 16.1 (3)       |
| C3   | 2638.8 (19)  | 9436.7 (8) | 3555.1 (14)  | 19.1 (3)       |
| C4   | 1246.2 (19)  | 9868.5 (8) | 2562.9 (14)  | 20.7 (3)       |
| C5   | 10.0 (19)    | 9443.9 (8) | 1483.7 (14)  | 19.4 (3)       |
| C6   | 156.0 (18)   | 8580.5 (8) | 1397.5 (13)  | 15.3 (3)       |
| C7   | -832.4 (18)  | 7966.8 (8) | 392.0 (13)   | 15.7 (3)       |
| C8   | -2282.5 (19) | 8017.4 (9) | -849.7 (14)  | 21.6 (3)       |
| C9   | -2879 (2)    | 7303.4 (9) | -1619.3 (15) | 24.3 (3)       |
| C10  | -2055.5 (19) | 6533.5 (9) | -1155.0 (15) | 22.0 (3)       |
| C11  | -618.9 (18)  | 6462.1 (8) | 72.5 (13)    | 17.7 (3)       |
| C12  | 0.7 (17)     | 7190.8 (8) | 835.6 (13)   | 14.9 (3)       |
| C13  | 2513.1 (17)  | 6665.7 (7) | 2911.4 (12)  | 13.2 (3)       |
| C14  | 3279.0 (17)  | 6055.1 (7) | 2324.3 (13)  | 14.7 (3)       |
| C15  | 2776.6 (17)  | 6632.4 (8) | 4329.2 (13)  | 15.0 (3)       |
| C16  | 4244.0 (17)  | 5409.8 (7) | 3140.6 (12)  | 13.1 (3)       |
| C17  | 3755.6 (17)  | 5988.2 (8) | 5138.9 (13)  | 14.6 (3)       |
| C18  | 4496.6 (16)  | 5352.2 (7) | 4567.4 (12)  | 11.7 (3)       |

**Table S2.** Anisotropic Displacement Parameters ( $\text{\AA}^2 \times 10^3$ ) for  $\alpha$ -CBP. The Anisotropic displacement factor exponent takes the form:  $-2\pi^2[h^2a^*{}^2U_{11}+2hka^*b^*U_{12}+\dots]$ .

| Atom | $U_{11}$ | $U_{22}$ | $U_{33}$ | $U_{23}$ | $U_{13}$ | $U_{12}$ |
|------|----------|----------|----------|----------|----------|----------|
| N1   | 16.4 (6) | 11.2 (5) | 11.1 (5) | 1.0 (4)  | 2.6 (4)  | 1.1 (4)  |
| C1   | 18.7 (7) | 11.9 (6) | 13.5 (6) | 2.2 (4)  | 8.7 (5)  | 2.4 (5)  |
| C2   | 21.4 (7) | 14.4 (6) | 13.4 (6) | 1.9 (5)  | 7.0 (5)  | 1.4 (5)  |
| C3   | 27.6 (8) | 16.1 (6) | 16.2 (6) | -2.2 (5) | 10.9 (6) | -3.2 (5) |
| C4   | 31.4 (8) | 12.0 (6) | 24.2 (7) | 1.3 (5)  | 16.9 (6) | 4.0 (5)  |
| C5   | 23.8 (8) | 16.1 (6) | 21.3 (7) | 5.3 (5)  | 11.8 (6) | 7.1 (5)  |
| C6   | 16.4 (7) | 15.8 (6) | 15.8 (6) | 2.8 (5)  | 8.3 (5)  | 3.3 (5)  |
| C7   | 14.4 (7) | 17.8 (6) | 15.9 (6) | 2.6 (5)  | 6.5 (5)  | 2.3 (5)  |
| C8   | 17.8 (8) | 25.4 (7) | 20.0 (7) | 5.7 (5)  | 4.3 (6)  | 5.7 (5)  |
| C9   | 16.8 (8) | 33.2 (8) | 18.6 (7) | 1.8 (6)  | 0.4 (6)  | -0.3 (6) |
| C10  | 19.3 (8) | 25.7 (7) | 19.7 (7) | -3.4 (6) | 5.0 (6)  | -4.9 (6) |
| C11  | 18.6 (7) | 16.8 (6) | 17.7 (6) | 0.7 (5)  | 6.1 (6)  | -1.4 (5) |

|     |          |          |          |          |         |          |
|-----|----------|----------|----------|----------|---------|----------|
| C12 | 14.6 (7) | 17.0 (6) | 13.7 (6) | 2.7 (5)  | 5.6 (5) | 0.8 (5)  |
| C13 | 13.8 (7) | 11.2 (6) | 13.7 (6) | 1.9 (4)  | 3.5 (5) | -0.2 (4) |
| C14 | 17.1 (7) | 14.3 (6) | 12.0 (6) | -0.5 (4) | 4.1 (5) | -0.6 (5) |
| C15 | 19.2 (7) | 12.6 (6) | 14.9 (6) | 0.3 (4)  | 8.2 (5) | 1.9 (5)  |
| C16 | 15.5 (7) | 10.4 (6) | 12.8 (6) | -1.7 (4) | 4.3 (5) | 1.0 (5)  |
| C17 | 18.9 (7) | 14.5 (6) | 11.6 (6) | 0.5 (4)  | 6.7 (5) | 1.2 (5)  |
| C18 | 12.8 (7) | 10.4 (5) | 12.0 (6) | -0.7 (4) | 4.4 (5) | -1.5 (4) |

**Table S3.** Bond Lengths for  $\alpha$ -CBP.

| Atom | Atom | Length/Å    | Atom | Atom             | Length/Å    |
|------|------|-------------|------|------------------|-------------|
| N1   | C1   | 1.4024 (16) | C8   | C9               | 1.380 (2)   |
| N1   | C12  | 1.4019 (17) | C9   | C10              | 1.405 (2)   |
| N1   | C13  | 1.4230 (15) | C10  | C11              | 1.384 (2)   |
| C1   | C2   | 1.3942 (18) | C11  | C12              | 1.3999 (18) |
| C1   | C6   | 1.4119 (18) | C13  | C14              | 1.3956 (17) |
| C2   | C3   | 1.3920 (18) | C13  | C15              | 1.3924 (17) |
| C3   | C4   | 1.4040 (19) | C14  | C16              | 1.3870 (16) |
| C4   | C5   | 1.382 (2)   | C15  | C17              | 1.3871 (17) |
| C5   | C6   | 1.3978 (18) | C16  | C18              | 1.4054 (16) |
| C6   | C7   | 1.4475 (19) | C17  | C18              | 1.4043 (16) |
| C7   | C8   | 1.396 (2)   | C18  | C18 <sup>1</sup> | 1.491 (2)   |
| C7   | C12  | 1.4129 (18) |      |                  |             |

<sup>1</sup>1-X,1-Y,1-Z

**Table S4.** Bond Angles for  $\alpha$ -CBP.

| Atom | Atom | Atom | Angle/°     | Atom | Atom | Atom | Angle/°     |
|------|------|------|-------------|------|------|------|-------------|
| C1   | N1   | C13  | 125.58 (10) | C8   | C9   | C10  | 120.65 (13) |
| C12  | N1   | C1   | 108.39 (10) | C11  | C10  | C9   | 121.68 (13) |
| C12  | N1   | C13  | 125.62 (10) | C10  | C11  | C12  | 117.40 (12) |
| N1   | C1   | C6   | 108.78 (11) | N1   | C12  | C7   | 108.80 (11) |
| C2   | C1   | N1   | 129.45 (12) | C11  | C12  | N1   | 129.70 (12) |
| C2   | C1   | C6   | 121.66 (12) | C11  | C12  | C7   | 121.49 (12) |
| C3   | C2   | C1   | 117.20 (12) | C14  | C13  | N1   | 120.37 (11) |
| C2   | C3   | C4   | 121.93 (13) | C15  | C13  | N1   | 120.38 (11) |
| C5   | C4   | C3   | 120.25 (12) | C15  | C13  | C14  | 119.24 (11) |
| C4   | C5   | C6   | 119.25 (13) | C16  | C14  | C13  | 120.09 (11) |
| C1   | C6   | C7   | 107.06 (11) | C17  | C15  | C13  | 120.21 (11) |
| C5   | C6   | C1   | 119.69 (12) | C14  | C16  | C18  | 121.75 (11) |

|     |    |     |            |     |     |                  |            |
|-----|----|-----|------------|-----|-----|------------------|------------|
| C5  | C6 | C7  | 133.19(13) | C15 | C17 | C18              | 121.74(11) |
| C8  | C7 | C6  | 133.29(12) | C16 | C18 | C18 <sup>1</sup> | 121.49(13) |
| C8  | C7 | C12 | 119.68(12) | C17 | C18 | C16              | 116.92(11) |
| C12 | C7 | C6  | 106.98(11) | C17 | C18 | C18 <sup>1</sup> | 121.59(13) |
| C9  | C8 | C7  | 119.08(13) |     |     |                  |            |

<sup>1</sup>1-X,1-Y,1-Z

**Table S5.** Hydrogen Atom Coordinates ( $\text{\AA}\times 10^4$ ) and Isotropic Displacement Parameters ( $\text{\AA}^2\times 10^3$ ) for  $\alpha$ -CBP.

| Atom | x     | y     | z     | U(eq) |
|------|-------|-------|-------|-------|
| H2   | 3780  | 8291  | 4165  | 19    |
| H3   | 3478  | 9740  | 4288  | 23    |
| H4   | 1154  | 10455 | 2634  | 25    |
| H5   | -929  | 9735  | 808   | 23    |
| H8   | -2851 | 8536  | -1161 | 26    |
| H9   | -3856 | 7333  | -2471 | 29    |
| H10  | -2496 | 6050  | -1698 | 26    |
| H11  | -74   | 5939  | 385   | 21    |
| H14  | 3139  | 6081  | 1364  | 18    |
| H15  | 2284  | 7052  | 4743  | 18    |
| H16  | 4748  | 4996  | 2724  | 16    |
| H17  | 3929  | 5977  | 6106  | 18    |

**Table S6.** Fractional Atomic Coordinates ( $\times 10^4$ ) and Equivalent Isotropic Displacement Parameters ( $\text{\AA}^2\times 10^3$ ) for  $\beta$ -CBP.  $U_{\text{eq}}$  is defined as 1/3 of the trace of the orthogonalised  $U_{ij}$  tensor.

| Atom | x          | y          | z           | U(eq)   |
|------|------------|------------|-------------|---------|
| N1   | 4529.6(6)  | 1992.8(13) | 2711.8(11)  | 17.0(3) |
| N2   | 2089.5(6)  | 5344.9(14) | -1316.9(11) | 17.3(4) |
| C1   | 4405.3(8)  | 1926.2(15) | 3600.2(13)  | 18.4(4) |
| C2   | 3953.1(8)  | 2136.0(17) | 4000.4(14)  | 21.9(4) |
| C3   | 3915.7(10) | 1917.8(18) | 4888.4(15)  | 26.7(5) |
| C4   | 4320.7(10) | 1528.7(18) | 5365.8(14)  | 26.6(5) |
| C5   | 4769.5(9)  | 1324.2(17) | 4965.4(14)  | 22.9(5) |
| C6   | 4811.9(8)  | 1499.8(16) | 4063.2(13)  | 18.6(4) |
| C7   | 5194.2(8)  | 1264.9(15) | 3427.3(14)  | 17.5(4) |
| C8   | 5665.8(8)  | 803.2(16)  | 3480.9(15)  | 20.4(4) |
| C9   | 5935.7(8)  | 651.0(17)  | 2721.6(15)  | 22.6(4) |
| C10  | 5742.0(8)  | 960.8(16)  | 1910.3(14)  | 21.5(5) |

|     |            |             |              |          |
|-----|------------|-------------|--------------|----------|
| C11 | 5275.6 (8) | 1426.2 (16) | 1831.2 (13)  | 18.1 (4) |
| C12 | 5003.3 (7) | 1564.7 (15) | 2599.1 (13)  | 16.7 (4) |
| C13 | 4235.9 (7) | 2512.6 (16) | 2061.9 (13)  | 16.5 (4) |
| C14 | 4064.2 (8) | 3561.4 (16) | 2213.1 (14)  | 19.0 (4) |
| C15 | 4115.2 (7) | 1988.7 (16) | 1283.7 (13)  | 17.2 (4) |
| C16 | 3751.8 (8) | 4049.5 (16) | 1609.0 (14)  | 18.4 (4) |
| C17 | 3807.2 (7) | 2490.2 (16) | 682.0 (13)   | 16.6 (4) |
| C18 | 3604.2 (7) | 3514.8 (16) | 843.8 (13)   | 15.7 (4) |
| C19 | 3213.6 (8) | 3991.7 (16) | 270.8 (13)   | 16.0 (4) |
| C20 | 2884.9 (8) | 4768.6 (17) | 600.7 (14)   | 20.4 (4) |
| C21 | 3145.9 (7) | 3643.2 (16) | -592.5 (14)  | 18.2 (4) |
| C22 | 2511.8 (9) | 5203.5 (16) | 86.1 (14)    | 20.8 (4) |
| C23 | 2768.0 (7) | 4058.9 (17) | -1107.9 (13) | 19.1 (4) |
| C24 | 2454.9 (7) | 4848.8 (16) | -770.6 (13)  | 16.9 (4) |
| C25 | 1581.9 (7) | 5409.5 (16) | -1159.3 (13) | 15.6 (4) |
| C26 | 1297.1 (8) | 4866.9 (16) | -535.9 (14)  | 18.4 (4) |
| C27 | 791.3 (8)  | 5073.2 (17) | -531.1 (14)  | 19.9 (4) |
| C28 | 574.4 (8)  | 5802.9 (17) | -1119.9 (14) | 20.2 (4) |
| C29 | 858.2 (7)  | 6325.8 (16) | -1742.3 (14) | 17.7 (4) |
| C30 | 1367.8 (7) | 6129.6 (15) | -1768.6 (13) | 15.2 (4) |
| C31 | 1767.1 (7) | 6531.9 (16) | -2312.9 (13) | 16.7 (4) |
| C32 | 1792.7 (8) | 7260.5 (16) | -3007.5 (13) | 19.0 (4) |
| C33 | 2250.0 (9) | 7502.9 (18) | -3367.8 (15) | 23.5 (5) |
| C34 | 2682.2 (8) | 7026.9 (18) | -3037.7 (15) | 24.0 (5) |
| C35 | 2667.7 (8) | 6288.4 (17) | -2355.6 (15) | 21.8 (4) |
| C36 | 2206.1 (8) | 6044.0 (16) | -2007.6 (13) | 17.7 (4) |

**Table S7.** Anisotropic Displacement Parameters ( $\text{\AA}^2 \times 10^3$ ) for  $\beta$ -CBP. The Anisotropic displacement factor exponent takes the form:  $-2\pi^2[h^2a^*2U_{11}+2hka^*b^*U_{12}+\dots]$ .

| Atom | $U_{11}$  | $U_{22}$  | $U_{33}$  | $U_{23}$ | $U_{13}$ | $U_{12}$  |
|------|-----------|-----------|-----------|----------|----------|-----------|
| N1   | 20.4 (9)  | 14.6 (8)  | 15.9 (8)  | 0.4 (7)  | -1.1 (7) | 1.7 (6)   |
| N2   | 16.3 (8)  | 18.2 (8)  | 17.5 (8)  | 1.4 (7)  | 0.3 (7)  | 1.4 (7)   |
| C1   | 27.5 (11) | 11.4 (9)  | 16.2 (10) | -2.2 (8) | -2.0 (9) | -1.7 (8)  |
| C2   | 27.4 (11) | 16.1 (10) | 22.2 (11) | -2.6 (8) | 0.7 (9)  | 1.9 (8)   |
| C3   | 35.9 (13) | 21.1 (11) | 23.1 (11) | -4.3 (9) | 7.8 (10) | -1.8 (10) |
| C4   | 45.5 (14) | 19.0 (11) | 15.2 (10) | -0.4 (8) | 2.5 (10) | -3.5 (10) |
| C5   | 35.5 (13) | 14 (1)    | 19.3 (10) | 0.1 (8)  | -5.6 (9) | -4.2 (9)  |
| C6   | 25.2 (10) | 11.6 (9)  | 19 (1)    | -1.3 (8) | -3.1 (9) | -3.8 (8)  |
| C7   | 22.1 (11) | 10.1 (8)  | 20.3 (10) | 1.1 (8)  | -4.1 (8) | -4.5 (8)  |
| C8   | 21.5 (11) | 14.6 (9)  | 24.9 (11) | 4.4 (8)  | -6.9 (9) | -3.8 (8)  |

|     |           |           |           |          |          |          |
|-----|-----------|-----------|-----------|----------|----------|----------|
| C9  | 18.1 (10) | 16.5 (10) | 33.2 (12) | 2.8 (9)  | -2.2 (9) | -1.1 (8) |
| C10 | 21.6 (11) | 16.1 (10) | 26.6 (12) | -0.6 (9) | 1.5 (9)  | -3.9 (8) |
| C11 | 21.7 (11) | 14.3 (9)  | 18.2 (10) | -0.1 (8) | -0.9 (8) | -3.3 (8) |
| C12 | 18.7 (9)  | 10.9 (8)  | 20.4 (10) | -0.1 (8) | -2.6 (8) | -2.2 (7) |
| C13 | 15.9 (9)  | 16 (1)    | 17.8 (10) | 1.4 (8)  | -1.2 (8) | -0.3 (8) |
| C14 | 24.4 (11) | 15.6 (10) | 16.9 (10) | -4.0 (8) | -3.3 (8) | -0.2 (8) |
| C15 | 18.8 (10) | 13.1 (9)  | 19.6 (10) | -2.1 (8) | 0.7 (8)  | 1.6 (8)  |
| C16 | 23.0 (11) | 12.0 (9)  | 20.1 (10) | -2.3 (8) | -2.8 (8) | 1.8 (8)  |
| C17 | 18 (1)    | 16.5 (9)  | 15.3 (9)  | -2.4 (8) | 0.8 (8)  | -0.3 (8) |
| C18 | 16.0 (9)  | 14.6 (9)  | 16.3 (10) | 0.5 (8)  | 1.0 (8)  | -1.2 (7) |
| C19 | 17.8 (10) | 12.6 (9)  | 17.6 (10) | 0.0 (8)  | 0.6 (8)  | -1.6 (8) |
| C20 | 25.3 (11) | 18.7 (10) | 17.1 (10) | -3.2 (8) | -1.7 (8) | 1.0 (8)  |
| C21 | 18.4 (10) | 17.3 (10) | 19 (1)    | -3.5 (8) | 0.6 (8)  | 3.2 (8)  |
| C22 | 22.4 (10) | 18.2 (10) | 21.7 (10) | -3.2 (9) | 1.0 (9)  | 4.0 (9)  |
| C23 | 22.1 (11) | 20.9 (11) | 14.2 (10) | -3.4 (8) | -1.0 (8) | 0.6 (8)  |
| C24 | 13.9 (9)  | 17.4 (10) | 19.3 (10) | 1.8 (8)  | -1.7 (8) | -0.3 (8) |
| C25 | 17.0 (9)  | 12.8 (9)  | 16.9 (10) | -5.2 (7) | -0.4 (8) | 0.1 (7)  |
| C26 | 23.2 (10) | 15.7 (10) | 16.5 (9)  | -1.1 (8) | -0.1 (8) | -1.9 (8) |
| C27 | 21.7 (10) | 17.7 (10) | 20.3 (10) | -4.6 (8) | 3.1 (9)  | -4.1 (8) |
| C28 | 16.2 (10) | 17.4 (10) | 27.1 (11) | -6.0 (9) | 1.2 (9)  | 0.0 (8)  |
| C29 | 19.4 (10) | 13.6 (9)  | 20.2 (10) | -3.2 (8) | -3.2 (8) | 2.0 (8)  |
| C30 | 19 (1)    | 10.6 (9)  | 16.1 (9)  | -4.6 (7) | -1.0 (8) | -1.0 (8) |
| C31 | 19.8 (10) | 14.5 (9)  | 15.7 (9)  | -4.9 (8) | 0.3 (8)  | -0.2 (7) |
| C32 | 24.9 (11) | 14.4 (9)  | 17.7 (10) | -2.3 (8) | -0.7 (9) | 1.7 (8)  |
| C33 | 33.4 (13) | 19.6 (10) | 17.6 (10) | 0.0 (8)  | 4.9 (9)  | -3.0 (9) |
| C34 | 23.7 (11) | 24.8 (11) | 23.4 (11) | -2.1 (9) | 7.0 (9)  | -4.8 (9) |
| C35 | 18.8 (10) | 23.6 (10) | 23.1 (10) | -0.9 (9) | 1.0 (9)  | -0.1 (8) |
| C36 | 22.8 (11) | 14.7 (9)  | 15.6 (9)  | -2.6 (7) | 1.0 (8)  | 0.3 (8)  |

**Table S8.** Bond Lengths for  $\beta$ -CBP.

| Atom | Atom | Length/Å  | Atom | Atom | Length/Å  |
|------|------|-----------|------|------|-----------|
| N1   | C1   | 1.400 (3) | C16  | C18  | 1.400 (3) |
| N1   | C12  | 1.392 (3) | C17  | C18  | 1.398 (3) |
| N1   | C13  | 1.422 (2) | C18  | C19  | 1.490 (3) |
| N2   | C24  | 1.428 (3) | C19  | C20  | 1.399 (3) |
| N2   | C25  | 1.391 (2) | C19  | C21  | 1.399 (3) |
| N2   | C36  | 1.398 (3) | C20  | C22  | 1.384 (3) |
| C1   | C2   | 1.388 (3) | C21  | C23  | 1.386 (3) |
| C1   | C6   | 1.406 (3) | C22  | C24  | 1.389 (3) |
| C2   | C3   | 1.387 (3) | C23  | C24  | 1.388 (3) |

|     |     |           |     |     |           |
|-----|-----|-----------|-----|-----|-----------|
| C3  | C4  | 1.398 (3) | C25 | C26 | 1.394 (3) |
| C4  | C5  | 1.379 (3) | C25 | C30 | 1.410 (3) |
| C5  | C6  | 1.400 (3) | C26 | C27 | 1.387 (3) |
| C6  | C7  | 1.446 (3) | C27 | C28 | 1.400 (3) |
| C7  | C8  | 1.395 (3) | C28 | C29 | 1.380 (3) |
| C7  | C12 | 1.415 (3) | C29 | C30 | 1.395 (3) |
| C8  | C9  | 1.382 (3) | C30 | C31 | 1.447 (3) |
| C9  | C10 | 1.398 (3) | C31 | C32 | 1.392 (3) |
| C10 | C11 | 1.387 (3) | C31 | C36 | 1.407 (3) |
| C11 | C12 | 1.394 (3) | C32 | C33 | 1.383 (3) |
| C13 | C14 | 1.393 (3) | C33 | C34 | 1.398 (3) |
| C13 | C15 | 1.392 (3) | C34 | C35 | 1.384 (3) |
| C14 | C16 | 1.387 (3) | C35 | C36 | 1.386 (3) |
| C15 | C17 | 1.384 (3) |     |     |           |

**Table S9.** Bond Angles for  $\beta$ -CBP.

| Atom | Atom | Atom | Angle/°     | Atom | Atom | Atom | Angle/°     |
|------|------|------|-------------|------|------|------|-------------|
| C1   | N1   | C13  | 124.75 (17) | C16  | C18  | C19  | 120.38 (18) |
| C12  | N1   | C1   | 108.48 (17) | C17  | C18  | C16  | 117.50 (18) |
| C12  | N1   | C13  | 126.49 (17) | C17  | C18  | C19  | 121.93 (18) |
| C25  | N2   | C24  | 126.97 (17) | C20  | C19  | C18  | 120.39 (18) |
| C25  | N2   | C36  | 108.43 (16) | C20  | C19  | C21  | 117.87 (19) |
| C36  | N2   | C24  | 123.36 (17) | C21  | C19  | C18  | 121.66 (18) |
| N1   | C1   | C6   | 108.85 (18) | C22  | C20  | C19  | 121.37 (19) |
| C2   | C1   | N1   | 128.76 (19) | C23  | C21  | C19  | 121.20 (19) |
| C2   | C1   | C6   | 122.16 (19) | C20  | C22  | C24  | 119.58 (19) |
| C3   | C2   | C1   | 117.3 (2)   | C21  | C23  | C24  | 119.70 (19) |
| C2   | C3   | C4   | 121.4 (2)   | C22  | C24  | N2   | 119.48 (18) |
| C5   | C4   | C3   | 121.1 (2)   | C23  | C24  | N2   | 120.18 (18) |
| C4   | C5   | C6   | 118.7 (2)   | C23  | C24  | C22  | 120.25 (18) |
| C1   | C6   | C7   | 106.99 (17) | N2   | C25  | C26  | 129.21 (19) |
| C5   | C6   | C1   | 119.3 (2)   | N2   | C25  | C30  | 108.92 (17) |
| C5   | C6   | C7   | 133.5 (2)   | C26  | C25  | C30  | 121.85 (18) |
| C8   | C7   | C6   | 133.76 (19) | C27  | C26  | C25  | 117.19 (19) |
| C8   | C7   | C12  | 119.4 (2)   | C26  | C27  | C28  | 121.7 (2)   |
| C12  | C7   | C6   | 106.83 (17) | C29  | C28  | C27  | 120.76 (19) |
| C9   | C8   | C7   | 119.05 (19) | C28  | C29  | C30  | 118.97 (19) |
| C8   | C9   | C10  | 120.70 (19) | C25  | C30  | C31  | 106.90 (17) |
| C11  | C10  | C9   | 121.9 (2)   | C29  | C30  | C25  | 119.55 (19) |
| C10  | C11  | C12  | 117.02 (19) | C29  | C30  | C31  | 133.55 (19) |



|     |     |     |             |     |     |     |             |
|-----|-----|-----|-------------|-----|-----|-----|-------------|
| N1  | C12 | C7  | 108.77 (18) | C32 | C31 | C30 | 134.09 (19) |
| N1  | C12 | C11 | 129.28 (19) | C32 | C31 | C36 | 119.14 (19) |
| C11 | C12 | C7  | 121.95 (18) | C36 | C31 | C30 | 106.76 (18) |
| C14 | C13 | N1  | 119.18 (18) | C33 | C32 | C31 | 119.2 (2)   |
| C15 | C13 | N1  | 121.17 (18) | C32 | C33 | C34 | 120.6 (2)   |
| C15 | C13 | C14 | 119.66 (18) | C35 | C34 | C33 | 121.6 (2)   |
| C16 | C14 | C13 | 119.62 (19) | C34 | C35 | C36 | 117.2 (2)   |
| C17 | C15 | C13 | 120.02 (18) | N2  | C36 | C31 | 108.95 (17) |
| C14 | C16 | C18 | 121.61 (19) | C35 | C36 | N2  | 128.69 (19) |
| C15 | C17 | C18 | 121.37 (18) | C35 | C36 | C31 | 122.34 (19) |

**Table S10.** Hydrogen Atom Coordinates ( $\text{\AA}\times 10^4$ ) and Isotropic Displacement Parameters ( $\text{\AA}^2\times 10^3$ ) for  $\beta$ -CBP.

| Atom | x    | y    | z     | U(eq) |
|------|------|------|-------|-------|
| H2   | 3680 | 2418 | 3679  | 26    |
| H3   | 3608 | 2035 | 5178  | 32    |
| H4   | 4286 | 1403 | 5976  | 32    |
| H5   | 5045 | 1069 | 5295  | 28    |
| H8   | 5799 | 596  | 4032  | 24    |
| H9   | 6256 | 333  | 2751  | 27    |
| H10  | 5935 | 849  | 1398  | 26    |
| H11  | 5147 | 1641 | 1278  | 22    |
| H14  | 4160 | 3940 | 2727  | 23    |
| H15  | 4244 | 1287 | 1165  | 21    |
| H16  | 3635 | 4764 | 1717  | 22    |
| H17  | 3732 | 2131 | 148   | 20    |
| H20  | 2918 | 5003 | 1190  | 24    |
| H21  | 3363 | 3112 | -830  | 22    |
| H22  | 2296 | 5741 | 318   | 25    |
| H23  | 2723 | 3804 | -1689 | 23    |
| H26  | 1443 | 4377 | -131  | 22    |
| H27  | 587  | 4710 | -118  | 24    |
| H28  | 228  | 5940 | -1091 | 24    |
| H29  | 709  | 6812 | -2147 | 21    |
| H32  | 1500 | 7587 | -3231 | 23    |
| H33  | 2271 | 7997 | -3844 | 28    |
| H34  | 2993 | 7215 | -3288 | 29    |
| H35  | 2962 | 5963 | -2135 | 26    |

**Table S11.** Fractional Atomic Coordinates ( $\times 10^4$ ) and Equivalent Isotropic Displacement Parameters ( $\text{\AA}^2 \times 10^3$ ) for  $\gamma$ -CBP.  $U_{\text{eq}}$  is defined as 1/3 of the trace of the orthogonalised  $U_{ij}$  tensor.

| Atom | <i>x</i>     | <i>y</i>    | <i>z</i>   | <i>U</i> (eq) |
|------|--------------|-------------|------------|---------------|
| N1   | 2860.8 (7)   | 9259.9 (17) | 2178.8 (3) | 15.3 (3)      |
| N2   | -1306.6 (7)  | 7680.4 (18) | 395.4 (3)  | 17.1 (3)      |
| C18  | 1095.3 (8)   | 8710.3 (19) | 1412.5 (4) | 14.2 (3)      |
| C12  | 3608.7 (8)   | 8929.0 (19) | 2104.7 (4) | 16.3 (3)      |
| C1   | 2793.0 (9)   | 9768.3 (19) | 2549.6 (4) | 17.0 (3)      |
| C7   | 4025.2 (9)   | 9257 (2)    | 2428.0 (4) | 18.3 (3)      |
| C6   | 3503.5 (9)   | 9754 (2)    | 2713.0 (4) | 19.5 (3)      |
| C13  | 2265.7 (8)   | 9119.5 (19) | 1923.5 (4) | 14.1 (3)      |
| C19  | 476.2 (8)    | 8452.1 (19) | 1145.6 (4) | 14.9 (3)      |
| C14  | 2333.5 (8)   | 9810.6 (19) | 1567.5 (4) | 14.5 (3)      |
| C25  | -2059.0 (8)  | 7785 (2)    | 484.0 (4)  | 17.4 (3)      |
| C26  | -2397.5 (9)  | 8201 (2)    | 819.2 (4)  | 20.4 (3)      |
| C24  | -706.8 (8)   | 7940 (2)    | 644.9 (4)  | 16.4 (3)      |
| C36  | -1243.4 (9)  | 7147 (2)    | 27.5 (4)   | 16.9 (3)      |
| C31  | -1960.4 (9)  | 6984 (2)    | -123.6 (4) | 19.4 (3)      |
| C23  | -712.3 (9)   | 7098 (2)    | 987.0 (4)  | 18.1 (3)      |
| C15  | 1607.1 (8)   | 8282.4 (19) | 2026.5 (4) | 15.1 (3)      |
| C35  | -612.4 (9)   | 6673 (2)    | -172.5 (4) | 19.6 (3)      |
| C2   | 2163.4 (9)   | 10297 (2)   | 2745.8 (4) | 19.9 (3)      |
| C17  | 1032.9 (8)   | 8093.1 (19) | 1775.2 (4) | 15.0 (3)      |
| C21  | -131.7 (9)   | 7354 (2)    | 1231.5 (4) | 18.0 (3)      |
| C20  | 471.4 (9)    | 9292 (2)    | 799.0 (4)  | 18.2 (3)      |
| C34  | -713.8 (10)  | 6037 (2)    | -528.6 (4) | 24.0 (4)      |
| C22  | -110.0 (9)   | 9046 (2)    | 553.0 (4)  | 19.3 (3)      |
| C16  | 1759.2 (8)   | 9588.9 (19) | 1316.6 (4) | 15.3 (3)      |
| C30  | -2483.0 (9)  | 7393 (2)    | 167.4 (4)  | 19.3 (3)      |
| C10  | 4714.9 (9)   | 8183 (2)    | 1779.9 (5) | 23.1 (3)      |
| C11  | 3949.0 (9)   | 8353 (2)    | 1780.2 (4) | 18.5 (3)      |
| C5   | 3578.3 (10)  | 10183 (2)   | 3085.8 (4) | 25.1 (4)      |
| C3   | 2255.7 (10)  | 10731 (2)   | 3114.6 (4) | 25.1 (4)      |
| C8   | 4801.0 (9)   | 9116 (2)    | 2416.3 (5) | 24.3 (4)      |
| C9   | 5140.8 (9)   | 8591 (2)    | 2092.8 (5) | 25.8 (4)      |
| C4   | 2954.0 (11)  | 10656 (2)   | 3284.1 (4) | 27.5 (4)      |
| C29  | -3256.8 (9)  | 7408 (2)    | 185.8 (5)  | 24.6 (4)      |
| C33  | -1422.3 (10) | 5906 (2)    | -686.1 (4) | 26.9 (4)      |
| C27  | -3163.7 (9)  | 8171 (2)    | 831.4 (5)  | 23.9 (4)      |
| C32  | -2045.2 (10) | 6383 (2)    | -485.3 (4) | 25.7 (4)      |
| C28  | -3592.4 (9)  | 7787 (2)    | 519.2 (5)  | 25.7 (4)      |

**Table S12.** Anisotropic Displacement Parameters ( $\text{\AA}^2 \times 10^3$ ) for  $\gamma$ -CBP. The Anisotropic displacement factor exponent takes the form:  $-2\pi^2[h^2a^*2U_{11}+2hka^*b^*U_{12}+\dots]$ .

| Atom | $U_{11}$  | $U_{22}$ | $U_{33}$  | $U_{23}$ | $U_{13}$  | $U_{12}$ |
|------|-----------|----------|-----------|----------|-----------|----------|
| N1   | 14.7 (7)  | 17.3 (6) | 13.8 (6)  | -0.2 (5) | -1.7 (5)  | -0.8 (5) |
| N2   | 16.0 (7)  | 20.5 (6) | 14.7 (6)  | -0.4 (5) | -3.5 (5)  | -1.2 (5) |
| C18  | 14.8 (7)  | 13.2 (7) | 14.7 (6)  | -1.9 (5) | -0.6 (5)  | 1.5 (6)  |
| C12  | 15.2 (8)  | 12.2 (7) | 21.4 (7)  | 2.7 (5)  | -3.8 (6)  | -1.2 (6) |
| C1   | 25.1 (9)  | 12.6 (7) | 13.4 (7)  | 1.8 (5)  | -2.8 (6)  | -3.9 (6) |
| C7   | 20.7 (8)  | 13.0 (7) | 21.3 (7)  | 3.8 (6)  | -7.3 (6)  | -2.4 (6) |
| C6   | 26.0 (9)  | 13.7 (7) | 18.8 (7)  | 4.6 (6)  | -5.3 (6)  | -3.5 (6) |
| C13  | 15.2 (8)  | 13.1 (7) | 14.1 (6)  | -1.8 (5) | -2.0 (5)  | 1.3 (6)  |
| C19  | 16.5 (8)  | 14.2 (7) | 14.1 (6)  | -1.9 (5) | -1.8 (5)  | 0.4 (6)  |
| C14  | 13.4 (7)  | 14.7 (7) | 15.3 (7)  | -1.0 (5) | 1.3 (5)   | -0.2 (6) |
| C25  | 18.1 (8)  | 13.5 (7) | 20.7 (7)  | 2.2 (6)  | -3.6 (6)  | -0.5 (6) |
| C26  | 23.1 (9)  | 17.2 (7) | 20.7 (7)  | -0.1 (6) | -2.0 (6)  | 1.1 (6)  |
| C24  | 17.0 (8)  | 16.3 (7) | 15.9 (7)  | -1.9 (5) | -3.6 (6)  | 0.1 (6)  |
| C36  | 21.0 (8)  | 14.7 (7) | 15.1 (7)  | 2.3 (5)  | -3.4 (6)  | -2.9 (6) |
| C31  | 20.4 (8)  | 19.3 (7) | 18.6 (7)  | 2.3 (6)  | -5.1 (6)  | -3.0 (6) |
| C23  | 17.7 (8)  | 18.6 (7) | 17.9 (7)  | 0.8 (6)  | -2.0 (6)  | -4.6 (6) |
| C15  | 16.5 (8)  | 14.8 (7) | 13.9 (6)  | 1.5 (5)  | 0.1 (5)   | 1.7 (6)  |
| C35  | 20.0 (8)  | 20.5 (8) | 18.4 (7)  | 1.9 (6)  | -2.3 (6)  | -2.4 (6) |
| C2   | 25.4 (9)  | 16.0 (7) | 18.3 (7)  | 2.2 (6)  | 1.2 (6)   | -3.3 (6) |
| C17  | 13.7 (8)  | 14.9 (7) | 16.5 (7)  | -0.5 (5) | 0.3 (5)   | -0.3 (6) |
| C21  | 20.6 (8)  | 19.0 (7) | 14.4 (6)  | 2.3 (6)  | -2.1 (6)  | -1.5 (6) |
| C20  | 17.6 (8)  | 20.1 (7) | 17.1 (7)  | 2.0 (6)  | -1.4 (6)  | -3.9 (6) |
| C34  | 26.8 (9)  | 26.0 (8) | 19.1 (7)  | -0.2 (6) | 2.3 (6)   | -2.3 (7) |
| C22  | 20.9 (8)  | 23.0 (8) | 13.9 (7)  | 2.4 (6)  | -2.4 (6)  | -2.4 (6) |
| C16  | 19.0 (8)  | 14.8 (7) | 12.2 (6)  | -0.5 (5) | 1.0 (5)   | 1.5 (6)  |
| C30  | 19.1 (8)  | 17.5 (7) | 21.2 (7)  | 2.1 (6)  | -4.4 (6)  | -1.3 (6) |
| C10  | 17.8 (9)  | 17.4 (7) | 34.0 (9)  | -2.3 (6) | 1.3 (7)   | 0.6 (6)  |
| C11  | 17.1 (8)  | 14.7 (7) | 23.6 (7)  | -1.4 (6) | -2.0 (6)  | -1.1 (6) |
| C5   | 37.3 (10) | 18.8 (8) | 19.3 (7)  | 4.5 (6)  | -10.9 (7) | -9.2 (7) |
| C3   | 41.2 (11) | 17.0 (8) | 17.3 (7)  | 0.6 (6)  | 5.6 (7)   | -4.4 (7) |
| C8   | 23.1 (9)  | 17.1 (8) | 32.6 (9)  | 3.0 (6)  | -12.7 (7) | -0.2 (6) |
| C9   | 14.8 (8)  | 19.8 (8) | 42.6 (10) | -0.1 (7) | -5.5 (7)  | 1.3 (6)  |
| C4   | 49.0 (12) | 19.7 (8) | 13.9 (7)  | 2.1 (6)  | -4.2 (7)  | -7.3 (8) |
| C29  | 19.9 (9)  | 25.8 (8) | 28.1 (8)  | 2.5 (7)  | -6.7 (7)  | -0.6 (7) |
| C33  | 33 (1)    | 31.7 (9) | 16.0 (7)  | -2.7 (6) | -3.3 (7)  | -5.1 (8) |
| C27  | 25.1 (9)  | 20.6 (8) | 26.1 (8)  | 2.3 (6)  | 3.8 (7)   | 5.5 (7)  |
| C32  | 26.2 (9)  | 31.0 (9) | 19.9 (8)  | 0.7 (7)  | -7.8 (6)  | -5.3 (7) |

C28            18.5 (9)    23.7 (8)            34.9 (9)            3.9 (7)            -1.1 (7)            2.2 (7)

**Table S13.** Bond Lengths for  $\gamma$ -CBP.

| Atom | Atom | Length/Å    | Atom | Atom | Length/Å  |
|------|------|-------------|------|------|-----------|
| N1   | C12  | 1.395 (2)   | C26  | C27  | 1.381 (2) |
| N1   | C1   | 1.4042 (18) | C24  | C23  | 1.390 (2) |
| N1   | C13  | 1.4211 (18) | C24  | C22  | 1.391 (2) |
| N2   | C25  | 1.395 (2)   | C36  | C31  | 1.408 (2) |
| N2   | C24  | 1.4231 (18) | C36  | C35  | 1.393 (2) |
| N2   | C36  | 1.3987 (18) | C31  | C30  | 1.447 (2) |
| C18  | C19  | 1.490 (2)   | C31  | C32  | 1.396 (2) |
| C18  | C17  | 1.3992 (19) | C23  | C21  | 1.385 (2) |
| C18  | C16  | 1.405 (2)   | C15  | C17  | 1.387 (2) |
| C12  | C7   | 1.415 (2)   | C35  | C34  | 1.389 (2) |
| C12  | C11  | 1.395 (2)   | C2   | C3   | 1.388 (2) |
| C1   | C6   | 1.411 (2)   | C20  | C22  | 1.389 (2) |
| C1   | C2   | 1.395 (2)   | C34  | C33  | 1.402 (2) |
| C7   | C6   | 1.446 (2)   | C30  | C29  | 1.395 (2) |
| C7   | C8   | 1.401 (2)   | C10  | C11  | 1.385 (2) |
| C6   | C5   | 1.398 (2)   | C10  | C9   | 1.404 (2) |
| C13  | C14  | 1.3959 (19) | C5   | C4   | 1.380 (3) |
| C13  | C15  | 1.389 (2)   | C3   | C4   | 1.401 (3) |
| C19  | C21  | 1.398 (2)   | C8   | C9   | 1.381 (2) |
| C19  | C20  | 1.4044 (19) | C29  | C28  | 1.383 (2) |
| C14  | C16  | 1.388 (2)   | C33  | C32  | 1.384 (2) |
| C25  | C26  | 1.397 (2)   | C27  | C28  | 1.401 (2) |
| C25  | C30  | 1.411 (2)   |      |      |           |

**Table S14.** Bond Angles for  $\gamma$ -CBP.

| Atom | Atom | Atom | Angle/°     | Atom | Atom | Atom | Angle/°     |
|------|------|------|-------------|------|------|------|-------------|
| C12  | N1   | C1   | 108.42 (12) | C23  | C24  | C22  | 118.91 (13) |
| C12  | N1   | C13  | 126.10 (12) | C22  | C24  | N2   | 120.83 (13) |
| C1   | N1   | C13  | 125.48 (12) | N2   | C36  | C31  | 108.79 (13) |
| C25  | N2   | C24  | 125.65 (12) | C35  | C36  | N2   | 129.48 (14) |
| C25  | N2   | C36  | 108.38 (12) | C35  | C36  | C31  | 121.53 (14) |
| C36  | N2   | C24  | 125.81 (13) | C36  | C31  | C30  | 107.07 (13) |
| C17  | C18  | C19  | 120.74 (13) | C32  | C31  | C36  | 119.64 (15) |
| C17  | C18  | C16  | 116.94 (13) | C32  | C31  | C30  | 133.10 (15) |

|     |     |     |             |     |     |     |             |
|-----|-----|-----|-------------|-----|-----|-----|-------------|
| C16 | C18 | C19 | 122.32 (13) | C21 | C23 | C24 | 120.46 (14) |
| N1  | C12 | C7  | 108.76 (13) | C17 | C15 | C13 | 120.27 (13) |
| N1  | C12 | C11 | 129.82 (14) | C34 | C35 | C36 | 117.62 (15) |
| C11 | C12 | C7  | 121.41 (14) | C3  | C2  | C1  | 117.45 (15) |
| N1  | C1  | C6  | 108.84 (13) | C15 | C17 | C18 | 121.83 (14) |
| C2  | C1  | N1  | 129.50 (14) | C23 | C21 | C19 | 121.83 (13) |
| C2  | C1  | C6  | 121.60 (14) | C22 | C20 | C19 | 121.62 (14) |
| C12 | C7  | C6  | 107.09 (14) | C35 | C34 | C33 | 121.57 (16) |
| C8  | C7  | C12 | 119.37 (15) | C20 | C22 | C24 | 120.31 (14) |
| C8  | C7  | C6  | 133.51 (14) | C14 | C16 | C18 | 121.70 (13) |
| C1  | C6  | C7  | 106.85 (13) | C25 | C30 | C31 | 106.67 (14) |
| C5  | C6  | C1  | 119.58 (15) | C29 | C30 | C25 | 119.99 (14) |
| C5  | C6  | C7  | 133.57 (15) | C29 | C30 | C31 | 133.32 (14) |
| C14 | C13 | N1  | 120.81 (13) | C11 | C10 | C9  | 121.59 (16) |
| C15 | C13 | N1  | 120.02 (13) | C10 | C11 | C12 | 117.75 (14) |
| C15 | C13 | C14 | 119.17 (13) | C4  | C5  | C6  | 119.01 (16) |
| C21 | C19 | C18 | 121.00 (13) | C2  | C3  | C4  | 121.51 (16) |
| C21 | C19 | C20 | 116.87 (13) | C9  | C8  | C7  | 119.25 (15) |
| C20 | C19 | C18 | 122.13 (13) | C8  | C9  | C10 | 120.50 (15) |
| C16 | C14 | C13 | 120.02 (13) | C5  | C4  | C3  | 120.76 (15) |
| N2  | C25 | C26 | 129.60 (14) | C28 | C29 | C30 | 118.70 (15) |
| N2  | C25 | C30 | 109.04 (13) | C32 | C33 | C34 | 120.32 (15) |
| C26 | C25 | C30 | 121.36 (15) | C26 | C27 | C28 | 121.87 (15) |
| C27 | C26 | C25 | 117.42 (15) | C33 | C32 | C31 | 119.27 (15) |
| C23 | C24 | N2  | 120.26 (13) | C29 | C28 | C27 | 120.64 (16) |

**Table S15.** Hydrogen Atom Coordinates ( $\text{\AA}\times 10^4$ ) and Isotropic Displacement Parameters ( $\text{\AA}^2\times 10^3$ ) for  $\gamma$ -CBP.

| Atom | <i>x</i> | <i>y</i> | <i>z</i> | U(eq) |
|------|----------|----------|----------|-------|
| H14  | 2773     | 10433    | 1497     | 17    |
| H26  | -2112    | 8493     | 1031     | 24    |
| H23  | -1117    | 6341     | 1054     | 22    |
| H15  | 1550     | 7838     | 2270     | 18    |
| H35  | -130     | 6782     | -69      | 24    |
| H2   | 1690     | 10358    | 2631     | 24    |
| H17  | 585      | 7529     | 1851     | 18    |
| H21  | -147     | 6767     | 1464     | 22    |
| H20  | 876      | 10047    | 731      | 22    |
| H34  | -293     | 5683     | -669     | 29    |
| H22  | -100     | 9637     | 321      | 23    |
| H16  | 1817     | 10043    | 1074     | 18    |

|     |       |       |      |    |
|-----|-------|-------|------|----|
| H10 | 4958  | 7782  | 1563 | 28 |
| H11 | 3665  | 8086  | 1567 | 22 |
| H5  | 4052  | 10149 | 3201 | 30 |
| H3  | 1836  | 11087 | 3255 | 30 |
| H8  | 5090  | 9378  | 2628 | 29 |
| H9  | 5667  | 8505  | 2082 | 31 |
| H4  | 2998  | 10934 | 3538 | 33 |
| H29 | -3547 | 7164  | -27  | 30 |
| H33 | -1475 | 5487  | -932 | 32 |
| H27 | -3407 | 8418  | 1058 | 29 |
| H32 | -2525 | 6302  | -592 | 31 |
| H28 | -4119 | 7787  | 537  | 31 |
